# Supplementary figures and images for: Genome-Wide Identification of Soybean ABC Transporters Relate to Aluminum Toxicity
Source: MDPI journal article supplement (doi:10.3390/ijms22126556), 2021-06-18

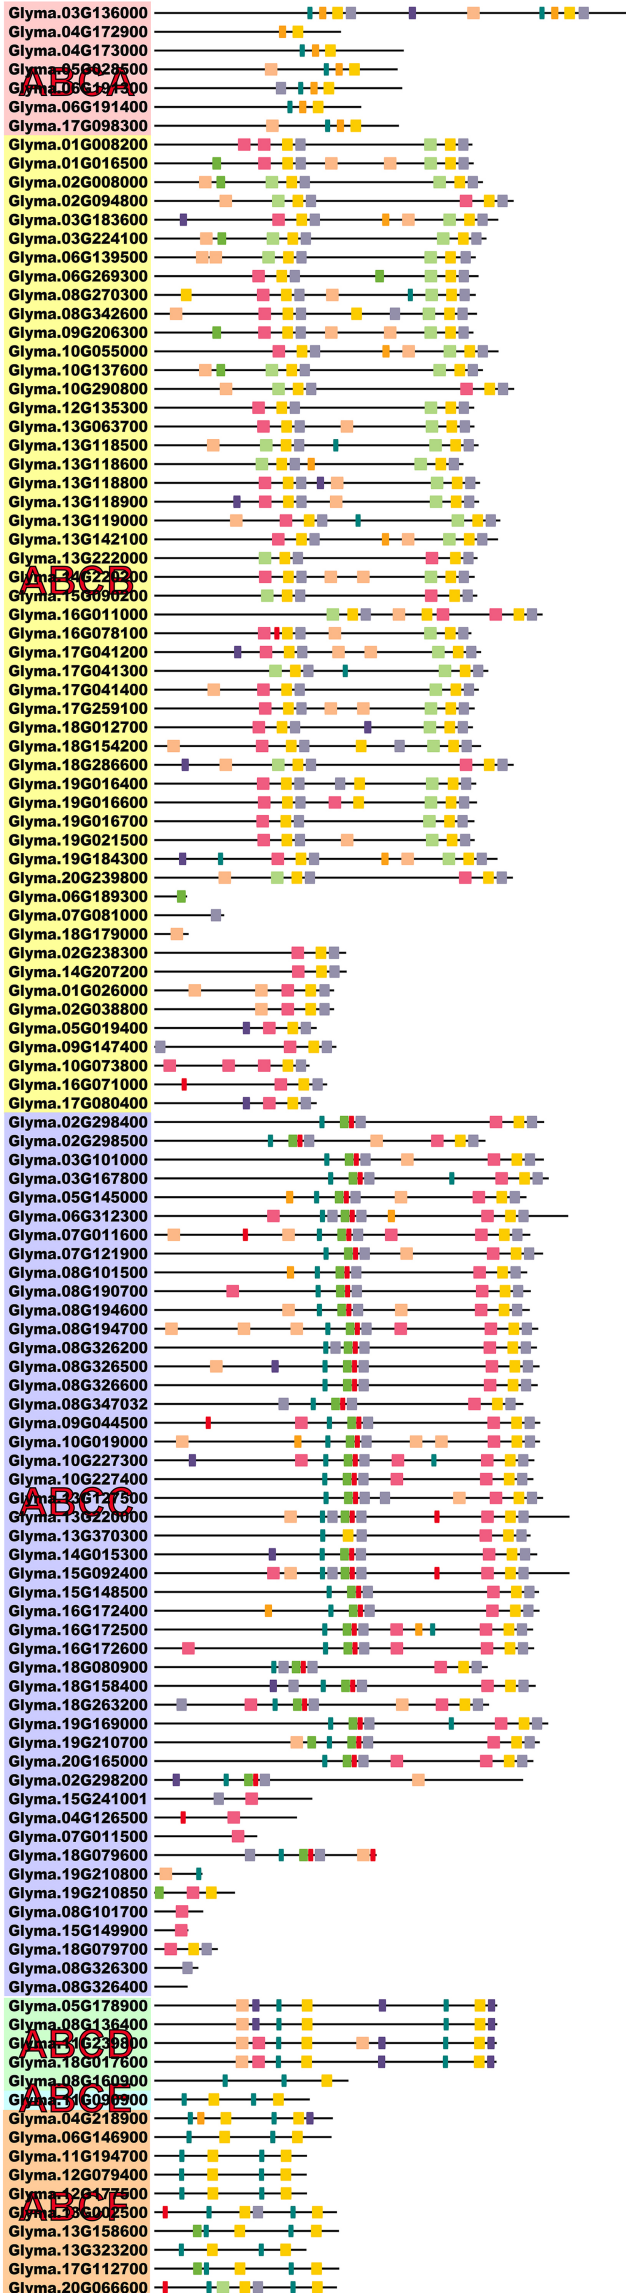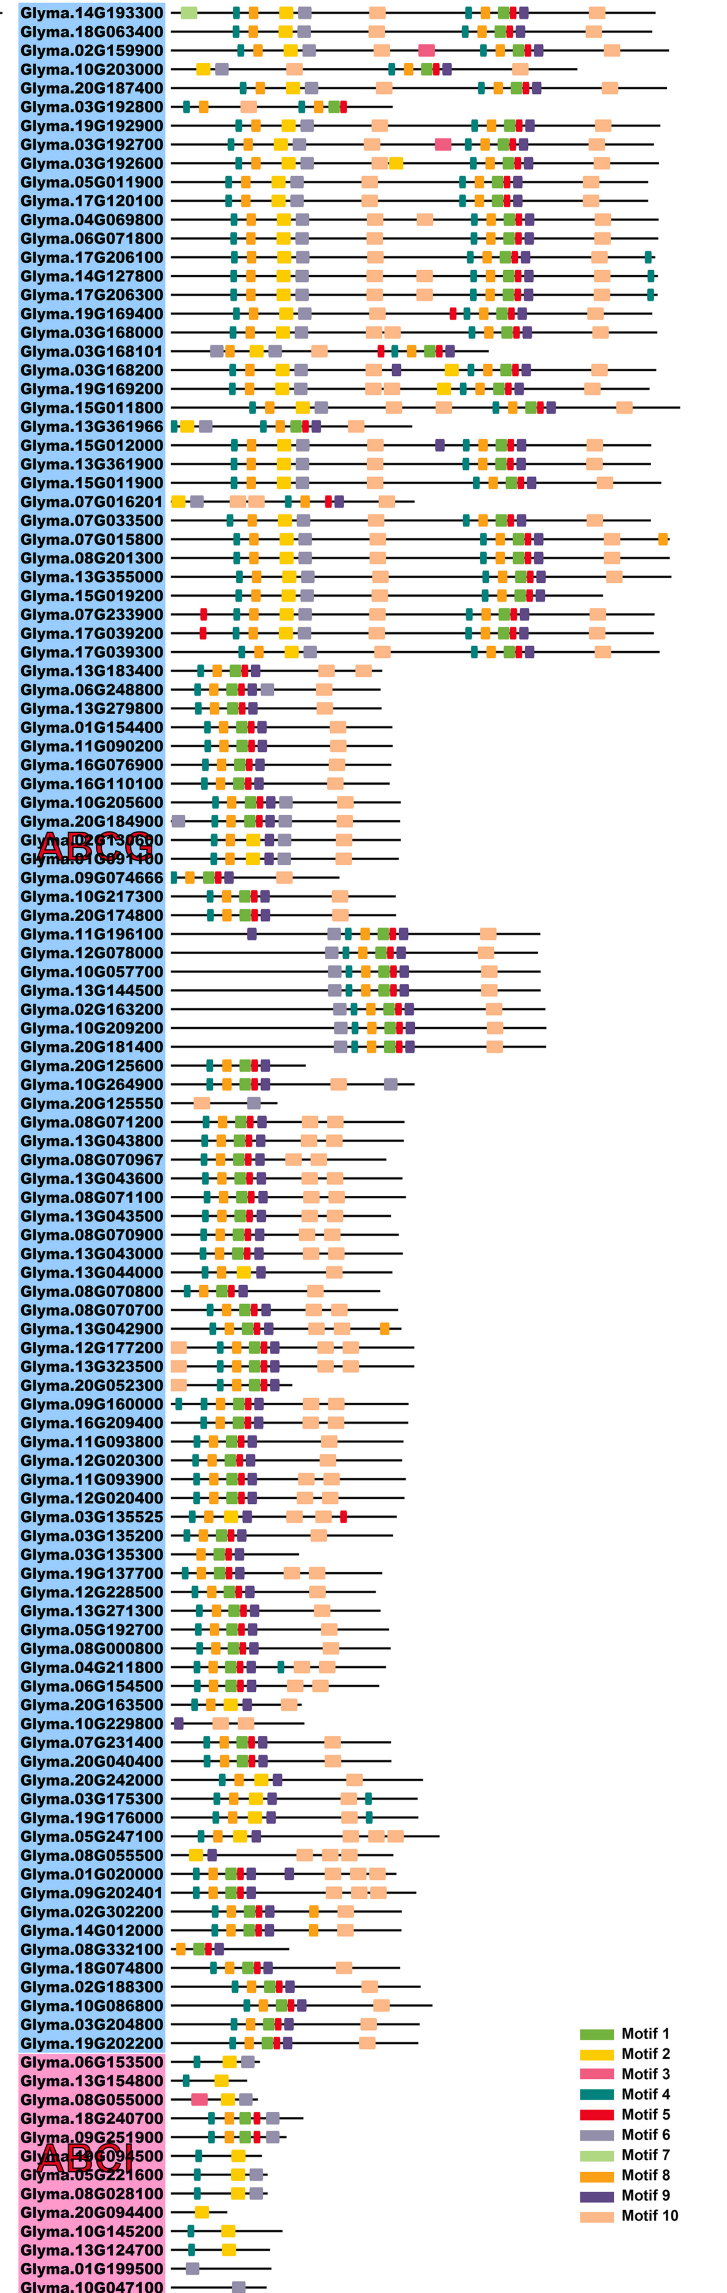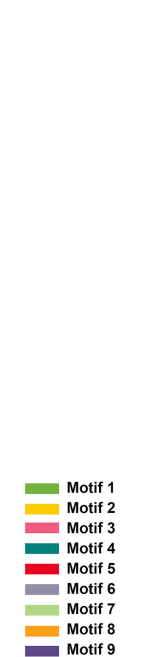

Supplement: s1 [file s1]
